# Supplementary material for: Identifying Dietary Patterns Associated with Mild Cognitive Impairment in Older Korean Adults Using Reduced Rank Regression
Source: PubMed Central journal article supplement (PMC5800199; doi:10.3390/ijerph15010100), 2018-01-09
Supplement: ijerph-15-00100-s001.pdf [file ijerph-15-00100-s001.pdf]

## Supplemental

**Table S1.** Selection of responses variables in the reduced rank regression (RRR) analysis.

|                                        | 1st Model     | 2nd Model  | 3rd Model  | 4th Model  | Final Model |
|----------------------------------------|---------------|------------|------------|------------|-------------|
|                                        | Vitamin B6    | Vitamin B6 | Vitamin B6 | Vitamin B6 | Vitamin B6  |
|                                        | Vitamin B12   |            |            |            |             |
|                                        | Vitamin C     | Vitamin C  | Vitamin C  | Vitamin C  | Vitamin C   |
|                                        | Vitamin E     | Vitamin E  |            |            |             |
| Responses                              | Calcium       | Calcium    |            |            |             |
|                                        | Zinc          | Zinc       | Zinc       |            |             |
|                                        | Folate        | Folate     | Folate     | Folate     |             |
|                                        | Iron          | Iron       | Iron       | Iron       | Iron        |
|                                        | Saturated fat |            |            |            |             |
| Explained variation in food groups (%) | 16.5          | 14.5       | 13.5       | 13.8       | 14.2        |
| Explained variation in responses (%)   | 10.7          | 12.1       | 15.0       | 16.1       | 17.8        |
